# Supplementary material for: ITGB3 and its related molecules are key regulatory mechanisms in cesarean scar pregnancy by proteomics and bioinformatics analysis
Source: Research Square preprint supplement (doi:10.21203/rs.3.rs-1600755/v1), 2022-05-04
Supplement: Supplementary file 1 [file e2898404c229c05b63089dff.xlsx]

## Sheet: Sheet1
Table 1 Comparison of two methods for finding differential gene associations
	Group	Intersecting DEGs	The rest	X2	P (Sig.)
1	CD_DEGs& SDvsD	236(14.19%)	3834(30.21%)	185.777	0
	CD_DEGs& RAW	1427(85.81%)	8856(69.79%)
2	CD_DEGs& SVvsV	246(14.70%)	3784(29.94%)	169.471	9.6528e-39
	CD_DEGs& RAW	1427(85.230%)	8856(70.06%)
3	EI_DEGs& SDvsD	610(12.57%)	16493(46.37%)	1999.06	0
	EI_DEGs& RAW	4243(87.43%)	19073(53.63%)
4	EI_DEGs& SVvsV	559(11.64%)	16504(46.39%)	2093.68	0
	EI_DEGs& RAW	4243(88.36%)	19073(53.61%)
